# Supplementary material
Source: publisher figshare collection journal article supplement (https://acs.figshare.com/ndownloader/files/20072615)
Supplement: Supplementary file 2 [file 20072615]

# Permission Request Form for Use of *Individual and/or Group Photos* in *ACS LiveSlides* from Copyright Owners/Publishers/Photographers Other Than ACS

**Date:** December 2, 2019

**To:** Geliang Tang  
School of Chemical Engineering, Dalian University of  
Technology, E-203 West Campus, 2 Linggong Road,  
Dalian 116024, China  
Publisher's/Copyright Owner's Contact Information  
642263656@qq.com

Publisher's/Copyright Owner's Email Address

**From:** Wenbo Yang  
School of Chemical Engineering, Dalian University of  
Technology, E-203 West Campus, 2 Linggong Road,  
Dalian 116024, China  
Your Name and Complete Mailing Address  
+86 13591763212

Your Phone Number Including Country and City Codes  
wbyang@dlut.edu.cn  
Your Email Address

Your Specific Deadline Date

I am preparing an *ACS LiveSlides* entitled:

Direct Observation of Long-Lived Upper Excited Triplet States and Intersystem Crossing in Anthracene-Containing Pt<sup>II</sup> Complexes

to appear with

Direct Observation of Long-Lived Upper Excited Triplet States and Intersystem Crossing in Anthracene-Containing Pt<sup>II</sup> Complexes

Title of ACS Publication and DOI

DOI: 10.1021/acs.jpcllett.9b03088

which is published by the American Chemical Society, a not-for-profit membership society and a STM signatory.

I would appreciate your permission to use the following material in all formats including but not limited to print, microform, electronic, and/or CD-ROM from the following reference:

## Individual Photographs of the Following Individuals:

## Collective Photograph (s) representing the following groups:

Group of Molecular Photochemistry and Photophysics (Prof. Jianzhang Zhao's Group)

If you, the photographer, have a required **credit line**, please include it below:

For your convenience, you may sign and date the bottom of this letter to indicate your agreement. Please return this form to me at the above email address, by the above **deadline date** (if given above). Thank you.

**Agreed:**

Geliang Tang  
Publisher's/Copyright Owner's Signature or Stamp

**Date:**

December 2, 2019

Date

Submit completed and signed form with your signed *ACS LiveSlides* Video Release.

7/25/16
