# Supplementary material
Source: publisher figshare collection journal article supplement (https://acs.figshare.com/ndownloader/files/20072615)
Supplement: Supplementary file 3 [file 20072615]

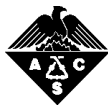

## AMERICAN CHEMICAL SOCIETY

### MODEL RELEASE FORM for *ACS LiveSlides* (Person in Photograph)

This form cannot be altered. For questions, please contact [ACSPubsMultimedia@acs.org](mailto:ACSPubsMultimedia@acs.org)

#### Requesting Permission:

Date: December 2, 2019

To: Xue Zhang  
School of Chemical Engineering, Dalian University  
of Technology, E-203 West Campus, 2 Linggong  
Road, Dalian 116024, China

Return to: Wenbo Yang  
School of Chemical Engineering, Dalian  
University of Technology, E-203 West  
Campus, 2 Linggong Road, Dalian  
116024, China

I am preparing material for

Direct Observation of Long-Lived Upper Excited Triplet States and Intersystem Crossing in Anthracene-Containing Pt<sup>II</sup> Complexes  
(title of ACS LifeSlide)

to be published by the American Chemical Society, a not-for-profit membership society.

I would like your permission to include the enclosed photograph(s) in which you appear. To indicate your permission, please sign and date the statement below and return this form to me.

I appreciate your prompt response.

Signed: Wenbo Yang December 2, 2019

.....  
**Grant of Permission:**

I hereby grant to the American Chemical Society royalty-free permission, including nonexclusive world rights in all languages, to reproduce in all formats including but not limited to print, microform, electronic, and/or CD-ROM, to reproduce and include my likeness as shown in the attached photocopy(ies) of photograph(s) for the above-mentioned publication.

Agree to and accepted:

Signature Xue Zhang Date: December 2, 2019

Check one of the blanks:

☐ I am the person in the photo

☒ I am the authorized agent for the person in the photo (for group photographs, one person, in the photograph, needs to sign on behalf of the group)

Submit completed and signed form with your signed ACS Journals LifeSlides Video Release.

7/19/16
